**Production and composition of group B streptococcal membrane vesicles  
varies across diverse lineages**

Cole R. McCutcheon<sup>1</sup>, Jennifer A. Gaddy<sup>2,3,4</sup>, David M. Aronoff<sup>2,3,5</sup>,  
Margaret G. Petroff<sup>1,6\*</sup>, and Shannon D. Manning<sup>1\*</sup>

<sup>1</sup> Department of Microbiology and Molecular Genetics, Michigan State University, East Lansing, MI, 48823

<sup>2</sup> Department of Medicine, Division of Infectious Disease, Vanderbilt University Medical Center, Nashville, TN

<sup>3</sup> Department of Pathology, Microbiology, and Immunology, Vanderbilt University Medical Center, Nashville, TN

<sup>4</sup> Tennessee Valley Healthcare System, Department of Veterans Affairs, Nashville, TN

<sup>5</sup> Department of Obstetrics and Gynecology, Vanderbilt University Medical Center, Nashville, TN

<sup>6</sup> Department of Pathobiology and Diagnostic Investigation, Michigan State University, East Lansing, MI, 48823

\*Co-corresponding authors: [mannin71@msu.edu](mailto:mannin71@msu.edu); [petrof10@msu.edu](mailto:petrof10@msu.edu)

1 **ABSTRACT**

2

3 Although the neonatal and fetal pathogen Group B *Streptococcus* (GBS) asymptotically  
4 colonizes the vaginal tract of ~30% of pregnant women, only a fraction of their offspring  
5 develops invasive disease. We and others have postulated that these dimorphic clinical  
6 phenotypes are driven by strain variability; however, the bacterial factors that promote these  
7 divergent clinical phenotypes remain unclear. It was previously shown that GBS produces  
8 membrane vesicles (MVs) that contain active virulence factors capable of inducing adverse  
9 pregnancy outcomes. Because the relationship between strain variation and vesicle composition  
10 or production is unknown, we sought to quantify MV production and examine the protein  
11 composition, using label-free proteomics on MVs produced by diverse clinical GBS strains  
12 representing three phylogenetically distinct lineages. We found that MV production varied across  
13 strains, with certain strains displaying nearly two-fold increases in production relative to others.  
14 Hierarchical clustering and principal component analysis of the proteomes revealed that MV  
15 composition is lineage-dependent but independent of clinical phenotype. Multiple proteins that  
16 contribute to virulence or immunomodulation, including hyaluronidase, C5a peptidase, and  
17 sialidases, were differentially abundant in MVs, and were partially responsible for this  
18 divergence. Together, these data indicate that production and composition of GBS MVs vary in a  
19 strain-dependent manner, suggesting that MVs have lineage-specific functions relating to  
20 virulence. Such differences may contribute to variation in clinical phenotypes observed among  
21 individuals infected with GBS strains representing distinct lineages.

22

23

## 24 **Introduction**

25           Group B *Streptococcus* (GBS) is an opportunistic pathogen that asymptotically  
26 colonizes ~30% of women either vaginally or rectally (1). In individuals with a compromised or  
27 altered immune state, including pregnant women, neonates, the elderly, and people living with  
28 diabetes mellitus, GBS can cause severe infections (1). Presentation of disease is variable  
29 between individuals: in elderly patients and neonates, GBS infection typically presents as  
30 septicemia, whereas in pregnant women it more commonly causes chorioamnionitis, preterm  
31 birth, or stillbirth (2, 3).

32           Despite the high prevalence of GBS colonization during pregnancy, only a fraction of  
33 babies born to colonized mothers develop an infection. In the United States pregnant individuals  
34 colonized with GBS are given antibiotics to reduce the risk of neonatal GBS infection, but even  
35 without such prophylaxis most neonates born to GBS-colonized mothers remain infection-free  
36 (4). The factors that determine whether a neonate develops GBS sepsis or not are incompletely  
37 understood, but evidence implicates bacterial strain variation as a key factor. For example,  
38 certain polysaccharide capsular serotypes of GBS are much more common at causing perinatal  
39 infections than others (5).

40           Outside of capsular serotyping, the application of multilocus sequence typing (MLST)  
41 has demonstrated that GBS isolates comprise multiple sequence types (STs) that are  
42 differentially correlated with disease outcomes (6). While ST-12 strains have been associated  
43 with asymptomatic colonization (7), ST-1 and ST-17 strains have been linked to invasive disease  
44 in adults and neonates, respectively (6, 8, 9). Moreover, our group has previously shown that  
45 different STs interact variably with host cells. ST-17 strains, for instance, had an enhanced  
46 ability to attach to gestational tissues, elicited stronger proinflammatory responses, and could

47 persist longer inside macrophages than other STs (10-12). Conversely, ST-12 strains were found  
48 to display increased tolerance to ampicillin relative to ST-17 strains (12), highlighting the  
49 divergence of these lineages and variation in the ability to withstand different stressors. The  
50 mechanisms underlying these strain-dependent differences, however, are poorly understood.

51 Many bacteria produce membrane vesicles (MVs) of varying sizes (20-500 nm)  
52 containing toxins and other virulence factors that can modulate immune responses and influence  
53 pathogenesis (13). In addition, GBS can produce MVs that have been implicated in driving  
54 infection risk, though this remains an area in need of more research (14, 15). While the exact role  
55 of GBS MVs in pathogenesis is not clear, intra-amniotic injection of GBS MVs produced by an  
56 invasive ST-7 strain induced preterm birth and intrauterine fetal death in mice (14). GBS MVs  
57 were also found to contain active virulence factors that could weaken murine gestational  
58 membranes, stimulate immune cell recruitment, and lyse host cells (14, 15). Hence, an important,  
59 unanswered question is whether MVs derived from strains belonging to distinct phylogenetic  
60 lineages and clinical sources vary in composition and pathogenic potential.

61 In this study, we sought to compare the quantity and protein composition of MVs  
62 produced by genetically distinct GBS strains and evaluate the relationships between proteomic  
63 profiles, strain characteristics, and clinical presentation. To accomplish these goals, we isolated  
64 MVs from six clinical strains representing three phylogenetic lineages (ST-1, ST-12, and ST-17),  
65 and used label-free proteomics to define the protein composition. Using this approach, we report  
66 that MV production and composition varies in a strain and ST-dependent manner, highlighting  
67 the importance of strain diversity on pathogenic potential.

68

69

70 **Methods**

71

72 **Bacterial strains**

73 GBS strains GB0020, GB0037, GB0112, GB0411, GB0653, and GB1455 were isolated  
74 as described (16, 17); the strain names have been abbreviated for clarity. The invasive isolates  
75 GB37, GB411, and GB1455 were isolated from the blood or cerebrospinal fluid of infants with  
76 early onset GBS disease (16), while the colonizing isolates GB20, GB112, and GB653 were  
77 isolated from vaginal/rectal swabs from asymptotically colonized mothers before or after  
78 childbirth (17). These isolates were previously characterized by MLST and capsular (*cps*)  
79 serotyping (7, 9) and represent the following three common ST, serotype combinations: ST-1,  
80 *cpsV* (GB20, GB37), ST-12, *cpsII* (GB653, GB1455), and ST-17, *cpsIII* (GB112, GB411).  
81 Strains were cultured using Todd-Hewitt Broth (THB) or Todd-Hewitt Agar (THA) (BD  
82 Diagnostics, Franklin Lakes, New Jersey, USA) overnight at 37°C with 5% CO<sub>2</sub>.

83

84 **Membrane vesicle (MV) isolation and purification**

85 The isolation and purification of MVs was performed as described (14, 18-20), with some  
86 modifications. Briefly, overnight THB cultures were diluted 1:50 into fresh broth and grown to  
87 late logarithmic phase (optical density at 600 nm, OD<sub>600</sub> = 0.9). Aliquots of culture were serially  
88 diluted and plated on THA for bacterial enumeration. Cultures were centrifuged at 2000 x g for  
89 20 minutes at 4°C. Supernatants were collected and re-centrifuged at 8500 x g for 15 minutes at  
90 4°C, followed by filtration through a 0.22 µm filter and concentration using Amicon Ultra-15  
91 centrifugal filters (10k Da cutoff) (Millipore Sigma, Burlington, MA, USA). Concentrated  
92 supernatants were subjected to ultracentrifugation for 2 hours at 150,000 x g at 4°C. For

93 quantification, pellets were washed by resuspending in PBS, re-pelleting at 150,000 x g at 4°C,  
94 and resuspending in PBS; pellets were stored at -80°C until usage.

95 For proteomics, pellets were resuspended in PBS and purified using qEV Single size  
96 exclusion columns (IZON Science, Christchurch, New Zealand) per the manufacturer's  
97 instructions. MV fractions were collected and re-concentrated using the Amicon Ultra-4  
98 centrifugal filters (10 kDa cutoff) (MilliporeSigma, Burlington, Massachusetts, USA) and  
99 brought to a final volume of 100 µL in PBS. To preserve the integrity of vesicle proteins,  
100 ProBlock Gold Bacterial Protease Inhibitor Cocktail (GoldBio, St. Louis, Missouri, USA) was  
101 added. MVs were stored at -80°C until usage.

102

### 103 **Electron microscopy**

104 To visualize GBS MVs, scanning electron microscopy (SEM) was performed on bacterial  
105 cultures grown to stationary phase in THB. Culture aliquots were fixed in equal volumes of 4%  
106 glutaraldehyde in 0.1 M phosphate buffered saline (pH 7.4), placed on poly-L-lysine coated 12  
107 mm coverslips, and incubated for 5 minutes. The coverslips were washed with water and  
108 dehydrated through increasing concentrations of ethanol (25%, 50%, 75%, 95%) for five minutes  
109 in each followed by three 5-minute changes in 100% ethanol. Samples were dried in a Leica  
110 Microsystems (model EM CPD300) critical point drier using liquid carbon dioxide as the  
111 transitional field. Lastly, samples were mounted on aluminum stubs using epoxy glue (System  
112 Three Quick Cure 5, System Three Resins, Inc, Lacey, Washington, USA) and coated with  
113 osmium (~10 nm thickness) using a NEOC-AT osmium coater (Meiwafosis Co., Ltd, Tokyo,  
114 Japan). Imaging was performed using a JEOL 7500F scanning electron microscope.

115 To evaluate MV morphology and purity, transmission electron microscopy (TEM) was  
116 performed on purified vesicles as described (19). MVs were fixed in 4% paraformaldehyde,  
117 loaded onto formvar-carbon coated grids, and counterstained with 2.5% glutaraldehyde and 0.1%  
118 uranyl acetate in PBS. Samples were imaged using a JEOL 1400 Flash transmission electron  
119 microscope.

120

### 121 **Quantification of vesicle production**

122 Nanoparticle tracking analysis was performed to quantify MVs produced by each strain  
123 (n=8-9 replicates per strain) using a NanoSight NS300 (Malvern Panalytical Westborough, MA,  
124 USA) equipped with an automated syringe sampler as described previously (19, 21). For each  
125 sample, MVs were diluted in phosphate buffered saline (1:100 – 1:1000) and injected with a flow  
126 rate of 50. Once loaded, five 20-second videos were recorded at a screen gain of 1 and camera  
127 level of 13. After capture, videos were analyzed at a screen gain of 10 and a detection threshold  
128 of 4 and data were subsequently exported to a CSV file for analysis using the R package  
129 tidyNano (accessed via: <https://nguyens7.github.io/tidyNano>) (21). Total MV counts were  
130 normalized by dividing by the colony forming units (CFUs) of each original bacterial culture.

131

### 132 **Proteomics**

133 Proteomic LC-MS/MS analysis of MVs was performed in duplicate or triplicate by the  
134 Proteomics Core at the Michigan State University Research Technology Support Facility  
135 (RTSF). Protein concentrations of purified MVs were determined using the Pierce Bicinchoninic  
136 Acid Assay (ThermoFisher Scientific, Waltham, Massachusetts) supplemented with 2% SDS in  
137 water to reduce the background signal from excess lipids contained within the vesicles. MVs (1.5

138  $\mu\text{g}$ ) were concentrated into a single band in a 4-20% Tris-Glycine SDS-PAGE gel (BioRad,  
139 Hercules, CA) that was fixed and stained using colloidal Coomassie blue (22).

140 Protein bands were excised from the gels and stored in 5% acetic acid at 4°C. Prior to  
141 analysis, in-gel trypsin digest and peptide extraction were performed. Briefly, gel bands were  
142 dehydrated twice using 100% acetonitrile and incubated with 10 mM dithiothreitol in 100 mM  
143 ammonium bicarbonate (pH~8.0) at 56°C for 45 minutes. Bands were incubated in the dark with  
144 50 mM iodoacetamide in 100 mM ammonium bicarbonate for 20 minutes followed by another  
145 dehydration. Sequencing grade modified trypsin (0.01  $\mu\text{g}/\text{uL}$  in 50 mM ammonium bicarbonate)  
146 was added to each gel band and incubated at 37°C overnight. Peptides extracted by bath  
147 sonication (in 60% acetonitrile, 1% trichloroacetic acid solution) were vacuum dried and re-  
148 suspended (in 2% acetonitrile/0.1% trifluoroacetic) prior to separation using a Thermo  
149 ACCLAIM C18 trapping column. Peptides were sprayed onto a ThermoFisher Q-Exactive HFX  
150 mass spectrometer for 90 minutes; the top 30 ions per survey were analyzed further using high  
151 energy induced dissociation. MS/MS spectra were converted into peak lists using Mascot  
152 Distiller v2.7.0 and searched against a SwissProt database containing all GBS sequences  
153 available through the National Center for Biotechnology Information (NCBI; accessed  
154 2/08/2019). Contaminants were identified using Mascot searching algorithm v2.7.0, while  
155 protein identities were validated using Scaffold v4.11.1.

156

## 157 **Data analysis**

158 To compare MV proteins between strains, proteomic data from all strains were compiled  
159 and normalized for inter-experimental variability using Scaffold. Only proteins with a minimum  
160 of two identified peptides falling above a 1% false discovery rate and 95% protein threshold,



161 were considered for downstream analysis. Proteins identified as contaminants (via the Mascot  
162 searching algorithm v 2.6.0) were removed, whereas proteins identified in both replicates for at  
163 least one strain were classified as MV-associated. Subcellular localization analysis was  
164 performed using pSORTdb (<https://db.psort.org>) with protein localization data for GBS strain  
165 2603VR (downloaded from pSORTdb on 3/6/2021). Data visualization and statistical analyses  
166 were performed using R version 4.1.0 (<https://www.R-project.org>). Principle component analysis  
167 (PCA) was performed and visualized using the `prcomp` and `fviz_pca` functions, respectively.  
168 Hierarchical clustering was performed using the `ph heatmap` function and clustered using  
169 Euclidean distances. Shapiro tests were used to determine whether data followed a normal  
170 distribution and Student t-test (two-sided) or Kruskal-Wallis one-way analysis of variance  
171 (ANOVA), in combination with the Dunn's *posthoc* test, were utilized to test for differences  
172 between groups. Multiple hypothesis testing was corrected using Benjamini-Hochberg or  
173 Bonferroni correction when necessary.

174

175

## 176 **RESULTS**

177

### 178 **MV production varies across GBS strains**

179 Visualization using SEM revealed abundant production of MVs by all six strains; these  
180 MVs were closely associated with bacterial cells (**Figure 1A-B, Figure S1**). Within a given  
181 culture, however, some cells displayed a relatively greater number of MVs on the cell surface  
182 (**Figure S1**). While rare, these “hyper-producers” were observed in different samples and strains.  
183 In addition, TEM revealed that MVs displayed a spherical morphology containing a lipid bilayer

184 and slightly electron dense interior (**Figure 1C-D, Figure S2**), which is typical of bacterial-  
185 derived MVs (14, 15).

186 Because electron microscopy suggested differences in MV production across strains, we  
187 used NanoSight analysis to quantify MV size and production. MVs from each of the six strains  
188 displayed a uniform size distribution, ranging between 100 and 200 nm (**Figure 2A**). Similar size  
189 distributions were also observed by ST. For MV quantification, total MV counts were  
190 normalized to the number of CFUs in the original bacterial cultures. Among the six strains, the  
191 average number of MVs/CFU was 0.108 with a range of 0.048-0.206 MVs/CFU; however,  
192 considerable variation was detected between strains (**Figure 2B**). Although no difference in MV  
193 quantity was observed in colonizing versus invasive strains belonging to ST-1 or ST-17, the ST-  
194 1 strains produced significantly fewer MVs relative to the ST-17 strains (**Figure S3**;  $p < 0.0001$ ).  
195 While the colonizing ST-12 (cpsII) GB653 strain produced similar vesicle quantities as the two  
196 ST-17 (cpsIII) strains, the invasive ST-12 (cpsII) isolate, GB1455, produced significantly more  
197 MVs than all other strains examined ( $p < 0.05$ ). By contrast, the colonizing ST-1 (cpsV) isolate,  
198 GB20, produced significantly fewer MVs compared to the strains representing all other STs ( $p$   
199  $< 0.05$ ).

200

### 201 **The MV proteome differs across GBS strains.**

202 Proteomics of purified MVs identified 643 total proteins among the six isolates with an  
203 average of 458 proteins per strain and range of 239-614 proteins per strain (**Table S1A**). Of note,  
204 the number of unique proteins varied by strain. MVs from ST-1 strains, for instance, had fewer  
205 unique proteins relative to the other STs with an average of 281 proteins compared to 601 and  
206 493 for the ST-12 and ST-17 strains, respectively. Regardless of ST, however, pSORTdb

207 predicted numerous proteins to be membrane (12-17%) and cell wall (2-11%) localized, while  
208 22-52% were predicted to be localized in the cytoplasm (**Figure 3A**). Although many proteins  
209 had a predicted subcellular localization, a large proportion of proteins had unidentified or  
210 unpredicted subcellular localization.

211       Among the total proteins detected, 62 were found in all biological replicates for the six  
212 strains (**Table S1B**). These proteins did not vary in spectral abundance between STs and  
213 therefore represent the shared MV proteome. Of these 62 proteins, 11 were highly abundant with  
214 a mean spectral count greater than 50 (**Table S1C**). Putative, uncharacterized transporters  
215 constituted many of these shared proteins, accounting for 39-44% of membrane protein spectral  
216 counts. In addition, 19-25% of spectral counts were predicted to have a membrane associated  
217 subcellular localization (**Figure 3B**).

218       Next, we examined whether these proteins were strain-specific or if they were shared in  
219 the six strains examined. Of all 643 proteins detected, 192 (29.9%) were detected in at least one  
220 biological replicate for all six strains regardless of the clinical phenotype or ST (**Figure 4**). In  
221 addition, 124 (19.28%) proteins were shared by the four ST-12 and ST-17 strains but were  
222 absent in the ST-1 strains, suggesting that the ST-1 MVs have a unique protein composition.  
223 While a minor proportion of proteins were ST- or strain specific, none were shared by all  
224 invasive or all colonizing strains.

225       We next considered the relationship between protein composition and strain  
226 characteristics using PCA. Even though the protein composition of MVs from invasive and  
227 colonizing strains overlapped, it was segregated by ST (**Figure 5**), though some overlap was  
228 observed between the ST-12 confidence ellipse and those for other STs. No overlap, however,  
229 was seen between the ST-1 and ST-17 strains, highlighting their distinct proteomes. This distinct

230 clustering was not observed when the relationship between protein composition and clinical  
231 phenotype was analyzed (**Figure S4**), with invasive and colonizing samples displaying a high  
232 degree of overlap with little to no separation of their respective confidence ellipses.

233 Hierarchical clustering of the protein data further demonstrated that MVs from strains  
234 belonging to the same ST had similar protein profiles forming distinct clusters by ST regardless  
235 of the clinical phenotype (**Figure 6**). Specifically, proteins from the ST-12 and ST-17 strains  
236 formed a distinct branch in the phylogeny that was separate from the ST-1 proteins, indicating  
237 that their protein composition was more similar to each other than to ST-1 strains. This  
238 observation supports the PCA, showing a higher degree of overlap between ST-12 and ST-17  
239 strains compared to ST-1 strains. Nonetheless, ST-12 and ST-17 strains were still  
240 distinguishable, with distinct nodes forming based on protein composition, indicating their  
241 divergent composition. This analysis further revealed that ST-1 strains lacked several proteins  
242 that were highly abundant in both the ST-12 and ST-17 strains. To a lesser degree than ST-1  
243 MVs, we observed that several highly abundant proteins found among the ST-17 strains were  
244 entirely absent in ST-12 strains.

245

#### 246 **Key virulence factors were differentially abundant in MVs across GBS lineages.**

247 To determine which proteins contributed most to the segregation observed in the PCA  
248 and hierarchical clustering analyses, we more thoroughly examined the 335 proteins that were  
249 significantly enriched in at least one ST (**Table S2**). Notably, several purported virulence factors  
250 including the C5a peptidase, hyaluronidase, and sialidase were highly enriched in a ST-  
251 dependent manner (**Figure 7**). Both the hyaluronidase and C5a peptidase were significantly more  
252 abundant in the two ST-17 strains compared to the ST-1 and ST-12 strains, whereas the sialidase

253 was detected at significantly higher levels in ST-1 versus ST-12 strains. Several proteins of  
254 unknown function were also among the most highly abundant and differentially enriched  
255 proteins detected. One hypothetical protein, for instance, was significantly more abundant in the  
256 ST-1 strains relative to strains representing the other two lineages (**Figure 7**). Similarly, another  
257 hypothetical protein was more abundant in the ST-12 strains (**Figure S5**); however, considerable  
258 variation was observed across replicates. Numerous phage-associated proteins including a holin  
259 and capsid protein, were also detected and found to be more abundant in the ST-17 strains along  
260 with several proteins associated with cell division (**Figure S6**). For example, the average  
261 abundance of cell division proteins FtsE, FtsQ, FtsZ, and FtsY, was significantly greater in the  
262 two ST-17 strains compared to those from other lineages. Differences in proteins linked to cell  
263 wall modification such as penicillin-binding proteins and capsule biosynthesis proteins, were  
264 also detected (**Figure S7**).

265

266

## 267 **DISCUSSION**

268 Current knowledge regarding GBS derived MVs is restricted to one clinical strain (14,  
269 15) and hence, we sought to examine MV production and composition in a set of clinical strains  
270 with different traits. While no clear association was observed between clinical phenotype and the  
271 production or composition of MVs, we have demonstrated that the GBS MV proteome is ST-  
272 dependent. The same was observed for MV production, though some variation was noted  
273 between strains of the same ST. Together, these data indicate that GBS MVs have strain-  
274 dependent functions that could impact survival in hosts, immunomodulation, and virulence.

275           This study expands our current knowledge of GBS MVs by highlighting their potential  
276 impact on virulence. Specifically, we demonstrated that GBS MVs have a high abundance of  
277 immunomodulatory virulence factors including C5a peptidase, hyaluronidase, and sialidase (23-  
278 25). The bifunctional C5a peptidase has been shown to promote the degradation of the  
279 proinflammatory complement component (C5a) while simultaneously promoting bacterial  
280 invasion into host cells (23, 24). MVs from both ST-17 (cpsIII) strains examined herein  
281 contained high levels of C5a peptidase, whereas ST-1 and ST-12 strains lacked this protein.  
282 Intriguingly, ST-17 strains were previously shown to possess distinct virulence gene profiles as  
283 well as unique alleles of *scpB* encoding the C5a peptidase (26, 27), suggesting that ST-17 strains  
284 may be primed to cause invasive infections. This suggestion is in line with epidemiological data  
285 showing that ST-17 strains are important for invasive disease in adults and neonates (6, 8, 9) as  
286 well as mechanistic studies showing an enhanced ability to attach to gestational tissues, induce  
287 stronger proinflammatory responses, and persist inside macrophages (10-12). Nonetheless, it is  
288 important to note that our clinical definitions of “invasive” versus “colonizing” strain types may  
289 not be representative of each strain population. Although strains isolated from an active infection  
290 clearly demonstrate “invasive” potential, it is possible that strains designated as “colonizing”  
291 could also cause an infection in specific circumstances and host environments.

292           Although sialidases have no known role in GBS pathogenesis (25), these proteins were  
293 shown to be immunomodulatory in other bacterial species (28, 29) while simultaneously  
294 promoting biofilm production and metabolism of host sugars (30, 31). The presence and  
295 abundance of sialidase was variable: the ST-1 and ST-17 MVs all contained sialidase, but the  
296 ST-12 MVs lacked it. In two prior studies examining GBS MVs produced by a ST-7 strain,  
297 A909, neither C5a peptidase nor sialidase were identified (14, 15), further highlighting

298 differences across strains. However, we cannot rule out the possibility that the abundance of  
299 these virulence factors was beneath the detection limit in those studies. Similarly, the previous  
300 analysis of GBS MVs highlighted the importance of hyaluronidase (14). This  
301 immunomodulatory factor has previously been shown to promote ascending infection, degrade  
302 host extracellular matrix components, and dampen the host immune response (24). While we  
303 also found high levels of hyaluronidase in the ST-17 MVs examined, our results further show  
304 that the ST-12 and ST-1 MVs contained significantly lower amounts of this protein.

305         It is also important to note that multiple uncharacterized and hypothetical proteins were  
306 detected. Previous reports have demonstrated that in gram positive species, roughly 30-60% of  
307 all MV proteins map to the cytoplasm (32, 33). While our results are consistent with this  
308 observation showing ~22-52% of all proteins mapping to the cytoplasm, roughly 25-41% of the  
309 GBS MV proteins had an unidentifiable subcellular localization. Similar trends of ST-dependent  
310 enrichment of several hypothetical proteins were observed, with these representing some of the  
311 most highly abundant proteins. Although some uncharacterized proteins, such as those classified  
312 as putative ABC transporters, have predicted functions, their role in vesicle function or virulence  
313 is currently unknown. Future analyses must be undertaken to identify which proteins play a role  
314 in MV associated pathogenesis.

315         Through this study, we have also identified a shared proteome among MVs from  
316 phylogenetically distinct GBS strains. In total, 62 proteins were consistently found within GBS  
317 MVs regardless of the ST. Indeed, over 17% of these shared proteins were highly abundant,  
318 indicating that they may be important for MV functionality. Even though many of these proteins  
319 have yet to be characterized, we identified an abundance of transporter proteins in MVs

320 suggesting a potential role in MV function. Separate of functionality, these shared proteins may  
321 be of value as potential MV markers in future studies.

322 While various mechanisms have been proposed for the biogenesis of gram positive MVs,  
323 those mechanisms important for GBS MV biogenesis are unclear (13, 34). Our data demonstrate  
324 that diverse GBS strains produce MVs with consistent size distributions, indicating that GBS  
325 MV production is ubiquitous. Purported mechanisms of MV biogenesis include phage mediated  
326 biogenesis (35, 36), membrane budding during division (37), and cell wall remodeling (13, 38).  
327 In line with these mechanisms, our proteomics analysis revealed the presence of phage  
328 associated proteins, division septum-associated proteins and cell wall-modifying enzymes.  
329 Several of these proteins were also differentially abundant, with some proteins being more highly  
330 enriched in certain STs. For instance, phage proteins were enriched in ST-17 strains but were  
331 nearly absent in ST-12 and ST-1 strains. Although we observed similar enrichment of cell  
332 division proteins in ST-12 and ST-17 strains relative to ST-1, cell wall modifying proteins were  
333 most abundant in the ST-17 strains. Taken together, these data indicate that MVs are produced  
334 by diverse strains with varying traits; however, the mechanisms for MV biogenesis appear to be  
335 strain dependent. Additional studies are needed to test this hypothesis.

336 Although our study has enhanced our understanding of the proteomic composition of  
337 GBS MVs, it has a few limitations. Because strains of each GBS lineage possess the same  
338 capsule (cps) type, it is difficult to differentiate between ST versus cps effects. Another concern  
339 when dealing with MVs is the presence of non-vesicular contaminants. In some eukaryotic and  
340 prokaryotic systems where the composition of MVs is well defined, markers are used to assess  
341 purity (39-41). Due to the relatively unknown composition of GBS MVs, however, we were  
342 unable to target specific markers to evaluate the purity. Rather, we relied on size exclusion



343 chromatography followed by TEM to further remove non-vesicular proteins from each MV  
344 preparation. While we likely have some contaminant proteins, the purity of our preparations  
345 exceeds those performed in prior GBS studies (14, 15) and mimics protocols optimized for  
346 removing extravesicular macromolecules from Gram positive MVs (14, 15, 42, 43). Indeed,  
347 studies in *Staphylococcus aureus* and *Streptococcus mutans* have confirmed the presence of  
348 similar proportions of cytoplasmic and extracellular proteins within MVs (32, 33). Further, while  
349 our study has greatly enhanced our understanding of GBS MV composition, it is known that  
350 other macromolecules are present within MVs (14). Whether these macromolecules display ST  
351 dependent composition is unclear; however, given these data further studies are warranted.

352         In summary, this comprehensive analysis of GBS MVs from strains representing three  
353 phylogenetically distinct lineages demonstrates strain dependent composition and production of  
354 MVs. Our data further demonstrate that MVs carry both known virulence factors and other  
355 proteins of unknown function in variable abundance between strains, suggesting that they may  
356 have altered functionality or ability to promote virulence. Follow up studies elucidating virulence  
357 and immunomodulatory properties of diverse strains of GBS MVs are therefore warranted,  
358 particularly given the high level of variation in protein composition observed among only these  
359 six strains. Taken together, these findings further highlight the importance of strain variation in  
360 GBS pathogenesis and shed light on the potential role of MVs in virulence.

361

362

363

364

365

366 **Acknowledgments**

367 We would like to thank Dr. H. Dele Davies for sharing the bacterial strains and Drs. Sean L.  
368 Nguyen and Soo H. Ahn for helpful conversations and assistance with data analysis. We also  
369 thank Karla Vasco for assisting with the hierarchical clustering heatmap analysis as well as  
370 Alicia Withrow, Carol Flegler, and Douglas Whitten for their assistance with TEM, SEM, and  
371 proteomics analysis, respectively.

372

373 **Funding**

374 This work was funded by the National Institutes of Health (NIH; AI154192 to S.D.M and  
375 M.G.P.) with additional support provided by AI134036 to D.M.A and HD090061 to J.A.G. and  
376 BX005352 from the Office of Research, Department of Veterans Affairs. Graduate student  
377 support for C.R.M. was provided by the Reproductive and Developmental Science Training  
378 Program funded by the NIH (T32 HDO87166) as well as the Eleanor L. Gilmore Endowed  
379 Excellence Award.

380

381 **Data Availability**

382 Raw proteomic data was submitted to the MassIVE database ([massive.ucsd.edu](http://massive.ucsd.edu)). Data can be  
383 accessed via <https://doi.org/doi:10.25345/C5RC1H> or <ftp://massive.ucsd.edu/MSV000087985/>.

384

385

386

387

388

389 **References**

- 390 1. Verani JR, McGee L, Schrag SJ. 2010. Prevention of perinatal group B streptococcal  
391 disease--revised guidelines from CDC, 2010. *Morb Mortal Wkly Rep* 59:1-36.
- 392 2. Doran KS, Nizet V. 2004. Molecular pathogenesis of neonatal group B streptococcal  
393 infection: no longer in its infancy. *Mol Microbiol* 54:23-31.
- 394 3. Edwards MS, Baker CJ. 2005. Group B streptococcal infections in elderly adults. *Clin*  
395 *Infect Dis* 41:839-47.
- 396 4. Aronoff DM, Blaser MJ. 2020. Disturbing the neonatal microbiome is a small price to  
397 pay for preventing early-onset neonatal group B *Streptococcus* disease: AGAINST:  
398 Against relying on antibiotics to prevent early-onset neonatal group B *Streptococcus*  
399 disease. *BJOG* 127:229.
- 400 5. Bianchi-Jassir F, Paul P, To KN, Carreras-Abad C, Seale AC, Jauneikaite E, Madhi SA,  
401 Russell NJ, Hall J, Madrid L, Bassat Q, Kwatra G, Le Doare K, Lawn JE. 2020.  
402 Systematic review of group B streptococcal capsular types, sequence types and surface  
403 proteins as potential vaccine candidates. *Vaccine* 38:6682-6694.
- 404 6. Jones N, Bohnsack JF, Takahashi S, Oliver KA, Chan MS, Kunst F, Glaser P, Rusniok C,  
405 Crook DW, Harding RM, Bisharat N, Spratt BG. 2003. Multilocus sequence typing  
406 system for group B *Streptococcus*. *J Clin Microbiol* 41:2530-6.
- 407 7. Manning SD, Lewis MA, Springman AC, Lehotzky E, Whittam TS, Davies HD. 2008.  
408 Genotypic diversity and serotype distribution of group B *Streptococcus* isolated from  
409 women before and after delivery. *Clin Infect Dis* 46:1829-37.
- 410 8. Flores AR, Galloway-Peña J, Sahasrabhojane P, Saldaña M, Yao H, Su X, Ajami NJ,  
411 Holder ME, Petrosino JF, Thompson E, Margarit Y Ros I, Rosini R, Grandi G,

- 412 Horstmann N, Teatero S, McGeer A, Fittipaldi N, Rappuoli R, Baker CJ, Shelburne SA.  
413 2015. Sequence type 1 group B *Streptococcus*, an emerging cause of invasive disease in  
414 adults, evolves by small genetic changes. Proc Natl Acad Sci U S A 112:6431-6.
- 415 9. Manning SD, Springman AC, Lehotzky E, Lewis MA, Whittam TS, Davies HD. 2009.  
416 Multilocus sequence types associated with neonatal group B streptococcal sepsis and  
417 meningitis in Canada. J Clin Microbiol 47:1143-8.
- 418 10. Korir ML, Knupp D, LeMerise K, Boldenow E, Loch-Carusio R, Aronoff DM, Manning  
419 SD. 2014. Association and virulence gene expression vary among serotype III group B  
420 *Streptococcus* isolates following exposure to decidual and lung epithelial cells. Infect  
421 Immun 82:4587-95.
- 422 11. Flaherty RA, Borges EC, Sutton JA, Aronoff DM, Gaddy JA, Petroff MG, Manning SD.  
423 2019. Genetically distinct Group B *Streptococcus* strains induce varying macrophage  
424 cytokine responses. PLoS One 14:e0222910.
- 425 12. Korir ML, Laut C, Rogers LM, Plemmons JA, Aronoff DM, Manning SD. 2017.  
426 Differing mechanisms of surviving phagosomal stress among group B *Streptococcus*  
427 strains of varying genotypes. Virulence 8:924-937.
- 428 13. Brown L, Wolf JM, Prados-Rosales R, Casadevall A. 2015. Through the wall:  
429 extracellular vesicles in Gram-positive bacteria, mycobacteria and fungi. Nat Rev  
430 Microbiol 13:620-30.
- 431 14. Surve MV, Anil A, Kamath KG, Bhutda S, Sthanam LK, Pradhan A, Srivastava R, Basu  
432 B, Dutta S, Sen S, Modi D, Banerjee A. 2016. Membrane vesicles of group B  
433 *Streptococcus* disrupt fetomaternal barrier leading to preterm birth. PLoS Pathog  
434 12:e1005816.

- 435 15. Armistead B, Quach P, Snyder JM, Santana-Ufret V, Furuta A, Brokaw A, Rajagopal L.  
436 2021. Hemolytic membrane vesicles of group B *Streptococcus* promote infection. *J Infect*  
437 *Dis* 223:1488-1496.
- 438 16. Davies HD, Adair C, McGeer A, Ma D, Robertson S, Mucenski M, Kowalsky L, Tyrell  
439 G, Baker CJ. 2001. Antibodies to capsular polysaccharides of group B *Streptococcus* in  
440 pregnant Canadian women: relationship to colonization status and infection in the  
441 neonate. *J Infect Dis* 184:285-91.
- 442 17. Spaetgens R, DeBella K, Ma D, Robertson S, Mucenski M, Davies HD. 2002. Perinatal  
443 antibiotic usage and changes in colonization and resistance rates of group B  
444 *Streptococcus* and other pathogens. *Obstet Gynecol* 100:525-33.
- 445 18. Klimentová J, Stulík J. 2015. Methods of isolation and purification of outer membrane  
446 vesicles from gram-negative bacteria. *Microbiol Res* 170:1-9.
- 447 19. Nguyen SL, Ahn SH, Greenberg JW, Collaer BW, Agnew DW, Arora R, Petroff MG.  
448 2021. Integrins mediate placental extracellular vesicle trafficking to lung and liver in  
449 vivo. *Sci Rep* 11:4217.
- 450 20. Chutkan H, Macdonald I, Manning A, Kuehn MJ. 2013. Quantitative and qualitative  
451 preparations of bacterial outer membrane vesicles. *Methods Mol Biol* 966:259-72.
- 452 21. Nguyen SL, Greenberg JW, Wang H, Collaer BW, Wang J, Petroff MG. 2019.  
453 Quantifying murine placental extracellular vesicles across gestation and in preterm birth  
454 data with tidyNano: A computational framework for analyzing and visualizing  
455 nanoparticle data in R. *PLoS One* 14:e0218270.
- 456 22. Dyballa N, Metzger S. 2009. Fast and sensitive colloidal coomassie G-250 staining for  
457 proteins in polyacrylamide gels. *J Vis Exp.* 30:1431.

- 458 23. Cheng Q, Stafslie D, Purushothaman SS, Cleary P. 2002. The group B streptococcal  
459 C5a peptidase is both a specific protease and an invasin. *Infect Immun* 70:2408-13.
- 460 24. Kolar SL, Kyme P, Tseng CW, Soliman A, Kaplan A, Liang J, Nizet V, Jiang D, Murali  
461 R, Arditi M, Underhill DM, Liu GY. 2015. Group B *Streptococcus* evades host immunity  
462 by degrading hyaluronan. *Cell Host Microbe* 18:694-704.
- 463 25. Yamaguchi M, Hirose Y, Nakata M, Uchiyama S, Yamaguchi Y, Goto K, Sumitomo T,  
464 Lewis AL, Kawabata S, Nizet V. 2016. Evolutionary inactivation of a sialidase in group  
465 B *Streptococcus*. *Sci Rep* 6:28852.
- 466 26. Brochet M, Couvé E, Zouine M, Vallaey T, Rusniok C, Lamy MC, Buchrieser C, Trieu-  
467 Cuot P, Kunst F, Poyart C, Glaser P. 2006. Genomic diversity and evolution within the  
468 species *Streptococcus agalactiae*. *Microbes Infect* 8:1227-43.
- 469 27. Springman AC, Lacher DW, Wu G, Milton N, Whittam TS, Davies HD, Manning SD.  
470 2009. Selection, recombination, and virulence gene diversity among group B  
471 streptococcal genotypes. *J Bacteriol* 191:5419-27.
- 472 28. Sudhakara P, Sellamuthu I, Aruni AW. 2019. Bacterial sialoglycosidases in Virulence  
473 and Pathogenesis. *Pathogens* 8:39.
- 474 29. Aruni W, Vanterpool E, Osbourne D, Roy F, Muthiah A, Dou Y, Fletcher HM. 2011.  
475 Sialidase and sialoglycoproteases can modulate virulence in *Porphyromonas gingivalis*.  
476 *Infect Immun* 79:2779-91.
- 477 30. Hardy L, Jespers V, Van den Bulck M, Buyze J, Mwambarangwe L, Musengamana V,  
478 Vaneechoutte M, Crucitti T. 2017. The presence of the putative *Gardnerella vaginalis*  
479 sialidase A gene in vaginal specimens is associated with bacterial vaginosis biofilm.  
480 *PLoS One* 12:e0172522.

- 481 31. Zaramela LS, Martino C, Alisson-Silva F, Rees SD, Diaz SL, Chuzel L, Ganatra MB,  
482 Taron CH, Secrest P, Zuñiga C, Huang J, Siegel D, Chang G, Varki A, Zengler K. 2019.  
483 Gut bacteria responding to dietary change encode sialidases that exhibit preference for  
484 red meat-associated carbohydrates. *Nat Microbiol* 4:2082-2089.
- 485 32. Lee EY, Choi DY, Kim DK, Kim JW, Park JO, Kim S, Kim SH, Desiderio DM, Kim  
486 YK, Kim KP, Gho YS. 2009. Gram-positive bacteria produce membrane vesicles:  
487 proteomics-based characterization of *Staphylococcus aureus*-derived membrane vesicles.  
488 *Proteomics* 9:5425-36.
- 489 33. Cao Y, Zhou Y, Chen D, Wu R, Guo L, Lin H. 2020. Proteomic and metabolic  
490 characterization of membrane vesicles derived from *Streptococcus mutans* at different pH  
491 values. *Appl Microbiol Biotechnol* 104:9733-9748.
- 492 34. Briaud P, Carroll RK. 2020. Extracellular vesicle biogenesis and functions in gram-  
493 positive bacteria. *Infect Immun* 88:e00433-20.
- 494 35. Toyofuku M, Cárcamo-Oyarce G, Yamamoto T, Eisenstein F, Hsiao CC, Kurosawa M,  
495 Gademann K, Pilhofer M, Nomura N, Eberl L. 2017. Prophage-triggered membrane  
496 vesicle formation through peptidoglycan damage in *Bacillus subtilis*. *Nat Commun* 8:481.
- 497 36. Toyofuku M, Nomura N, Eberl L. 2019. Types and origins of bacterial membrane  
498 vesicles. *Nat Rev Microbiol* 17:13-24.
- 499 37. Vdovikova S, Luhr M, Szalai P, Nygård Skalman L, Francis MK, Lundmark R, Engedal  
500 N, Johansson J, Wai SN. 2017. A novel role of *Listeria monocytogenes* membrane  
501 vesicles in inhibition of autophagy and cell death. *Front Cell Infect Microbiol* 7:154.

- 502 38. Wang X, Thompson CD, Weidenmaier C, Lee JC. 2018. Release of *Staphylococcus*  
503 *aureus* extracellular vesicles and their application as a vaccine platform. Nat Commun  
504 9:1379.
- 505 39. Sarker S, Scholz-Romero K, Perez A, Illanes SE, Mitchell MD, Rice GE, Salomon C.  
506 2014. Placenta-derived exosomes continuously increase in maternal circulation over the  
507 first trimester of pregnancy. J Transl Med 12:204.
- 508 40. Rompikuntal PK, Vdovikova S, Duperthuy M, Johnson TL, Åhlund M, Lundmark R,  
509 Oscarsson J, Sandkvist M, Uhlin BE, Wai SN. 2015. Outer membrane vesicle-mediated  
510 export of processed PrtV protease from *Vibrio cholerae*. PLoS One 10:e0134098.
- 511 41. Vanaja SK, Russo AJ, Behl B, Banerjee I, Yankova M, Deshmukh SD, Rathinam VAK.  
512 2016. Bacterial outer membrane vesicles mediate cytosolic localization of LPS and  
513 caspase-11 activation. Cell 165:1106-1119.
- 514 42. Mehanny M, Koch M, Lehr CM, Fuhrmann G. 2020. Streptococcal extracellular  
515 membrane vesicles are rapidly internalized by immune cells and alter their cytokine  
516 release. Front Immunol 11:80.
- 517 43. Dauros Singorenko P, Chang V, Whitcombe A, Simonov D, Hong J, Phillips A, Swift S,  
518 Blenkiron C. 2017. Isolation of membrane vesicles from prokaryotes: a technical and  
519 biological comparison reveals heterogeneity. J Extracell Vesicles 6:1324731.  
520  
521



522 **Figure 1: Electron microscopy of membrane vesicles (MVs) from overnight cultures post-**  
523 **purification.** Overnight cultures of GBS strains were visualized by electron microscopy.  
524 Representative images include the: **A)** invasive ST-1, cpsV (GB37) strain, and **B)** colonizing ST-  
525 17, cpsIII (GB112) strain examined by scanning electron microscopy (SEM) at 10,000x  
526 magnification with a minimum of 2 replicates per strain. SEM scale bars indicate 1  $\mu\text{m}$  length.  
527 Representative transmission electron microscopy (TEM) images of MVs from the same **C)**  
528 invasive and **D)** colonizing strains following purification using ultracentrifugation and size  
529 exclusion chromatography (2-3 replicates per strain). TEM images were taken at a magnification  
530 of 20,000x and the scale bars indicate a length of 200 nm.

531

532

533

534

535

536

537

538

539

540

541

542

543

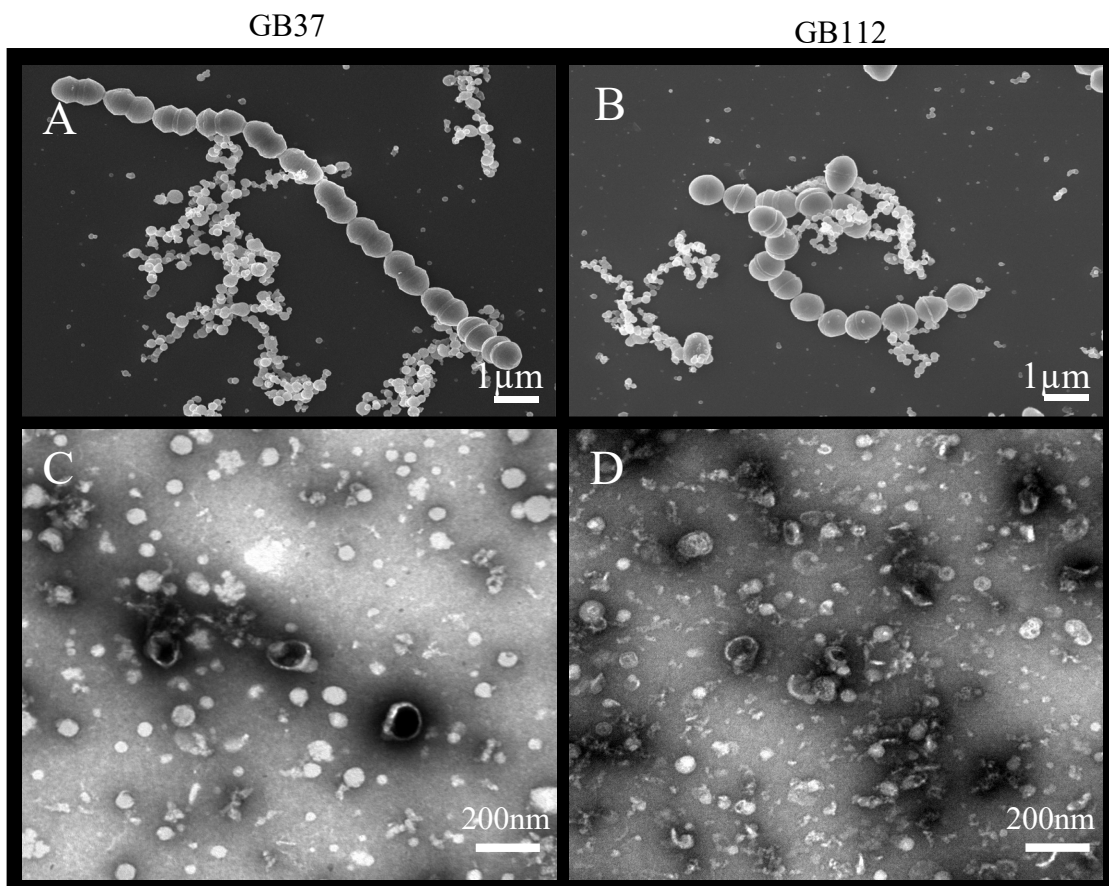

544 **Figure 2: Quantitative assessment of membrane vesicle (MV) production across strains.**

545 MVs were isolated by differential centrifugation and quantified using NanoSight analysis. The  
546 vesicle **A)** size distribution and **B)** number per bacterial colony forming units (CFUs) are shown  
547 for the invasive and colonizing strains by sequence type (ST). For panel B, the lines show the  
548 mean across 8-9 biological replicates (indicated by colored dots). Shaded regions surrounding  
549 the lines are the standard error of the mean and the black dots are outliers identified by  
550 multiplying the interquartile range by 1.5, which was used to extend the upper and lower  
551 quartiles. Outliers were excluded from the analysis. Differences in production were assessed  
552 using the Kruskal Wallis test followed by a *posthoc* Dunn's Test with a Benjamini-Hochberg  
553 correction. \*p-value <0.05 with higher production for all possible comparisons unless otherwise  
554 indicated, while # indicates a p-value <0.05 with lower production.

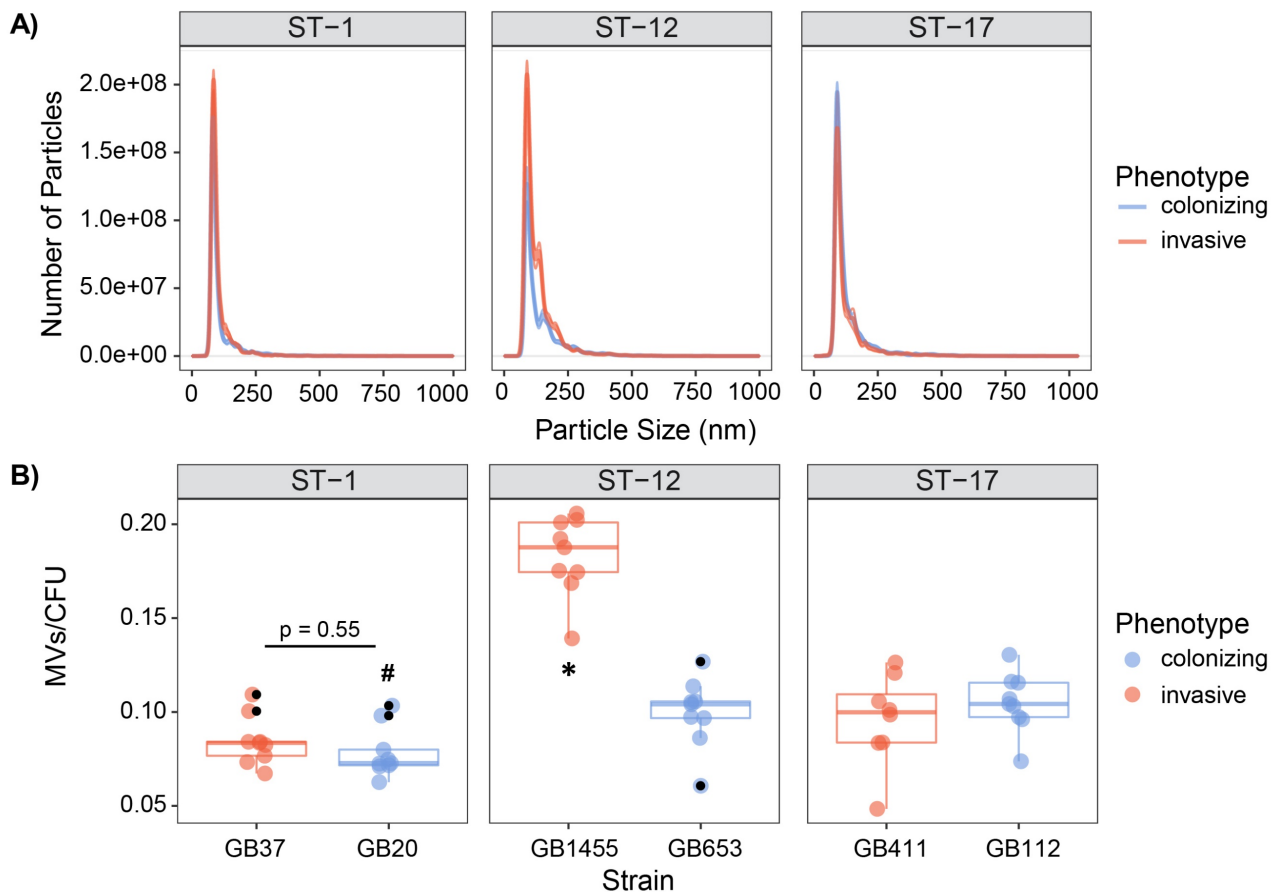

555 **Figure 3. Subcellular localization analysis of membrane vesicle (MV) proteomes.** The  
556 subcellular localization of **A)** all 643 MV proteins identified, and **B)** a subset of 62 shared MV  
557 proteins identified using a pSORTdb database for published *Streptococcus agalactiae* sequences  
558 (accessed 3/3/21). Percentages were determined from mean spectral counts for a given sequence  
559 type (ST).

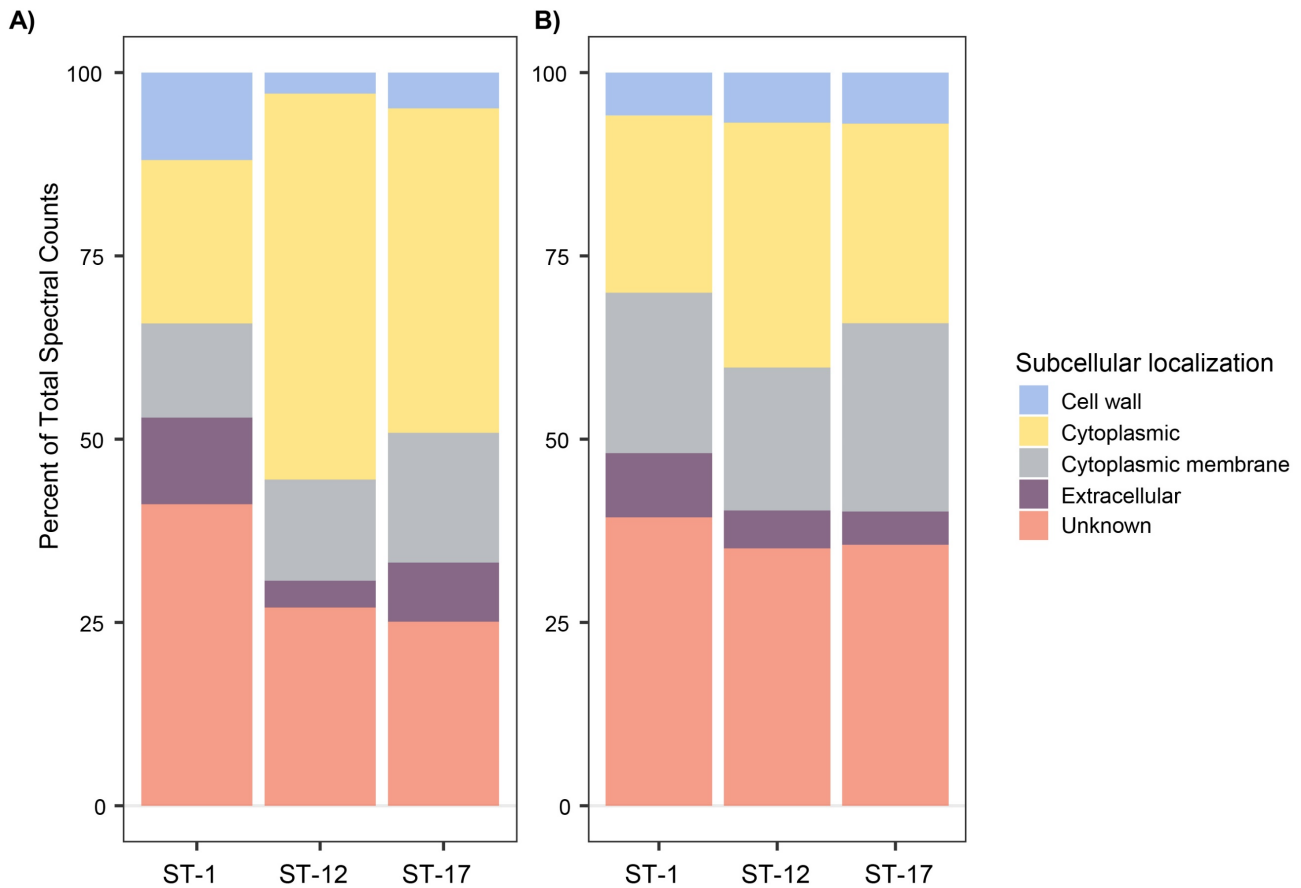

560

561

562

563

564

565 **Figure 4. Distribution of proteins detected in membrane vesicles (MVs) among six strains.**

566 An Upset plot was generated to show the distribution of all 643 proteins detected across the six  
567 GBS strains examined. The y-axis indicates the total number of proteins detected for a given set  
568 of strains. Protein presence is defined as having a non-zero spectral count for a given protein in  
569 at least one biological replicate for a specific strain. The matrix at the base of the plot shows the  
570 strains ordered vertically by sequence type with filled bubbles indicating which strains are  
571 positive for the number of proteins detected, and overlaid bars representing number of shared  
572 proteins.

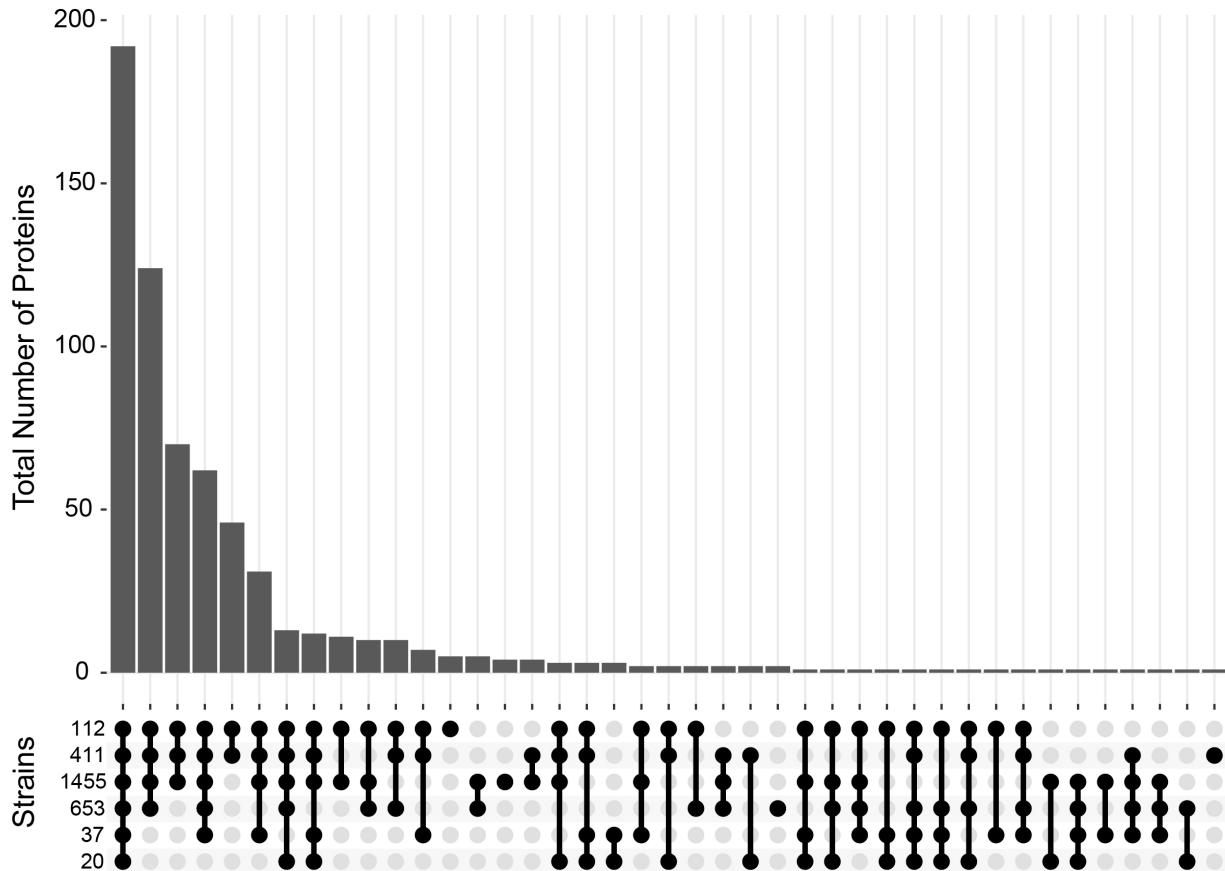

573

574

575 **Figure 5: Principal component analysis (PCA) reveals lineage-specific clustering of**  
576 **membrane vesicle (MV) proteomes.** PCA of the MV proteomes produced by six strains  
577 stratified by sequence type (ST). The large central dot of each ellipse represents the mean point  
578 of the corresponding 95% confidence ellipse, while the smaller points represent individual  
579 proteomic samples. Confidence ellipses comprise 95% of the samples based on the underlying  
580 distribution. Axes percentages represent the amount of variation accounted for by each principal  
581 component (PC).

582

583

584

585

586

587

588

589

590

591

592

593

594

595

596

597

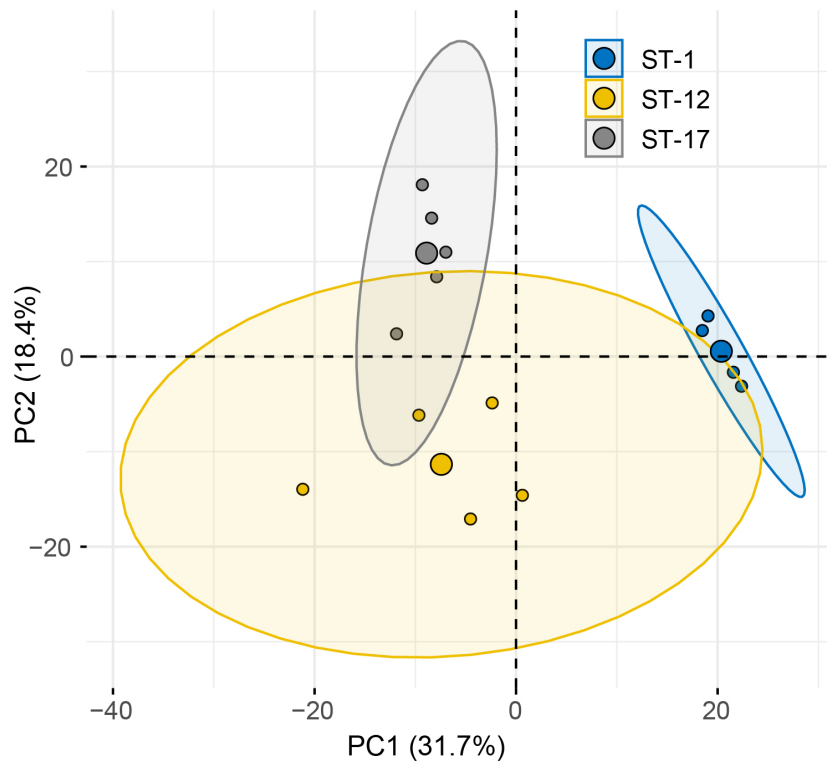

598 **Figure 6: Hierarchical clustering of membrane vesicle (MV) proteomes shows ST specific**  
599 **clustering.** A heatmap was generated using hierarchical clustering with the pheatmap function  
600 in R, which uses Euclidean distance to cluster rows and columns with similar profiles. Individual  
601 rows represent a single accession number for an identified protein, with the color gradient of  
602 individual boxes corresponding to the natural log (Ln) transformation of spectral counts for a  
603 given protein of interest. Columns represent a single proteomic sample, which are color coded by  
604 strain.

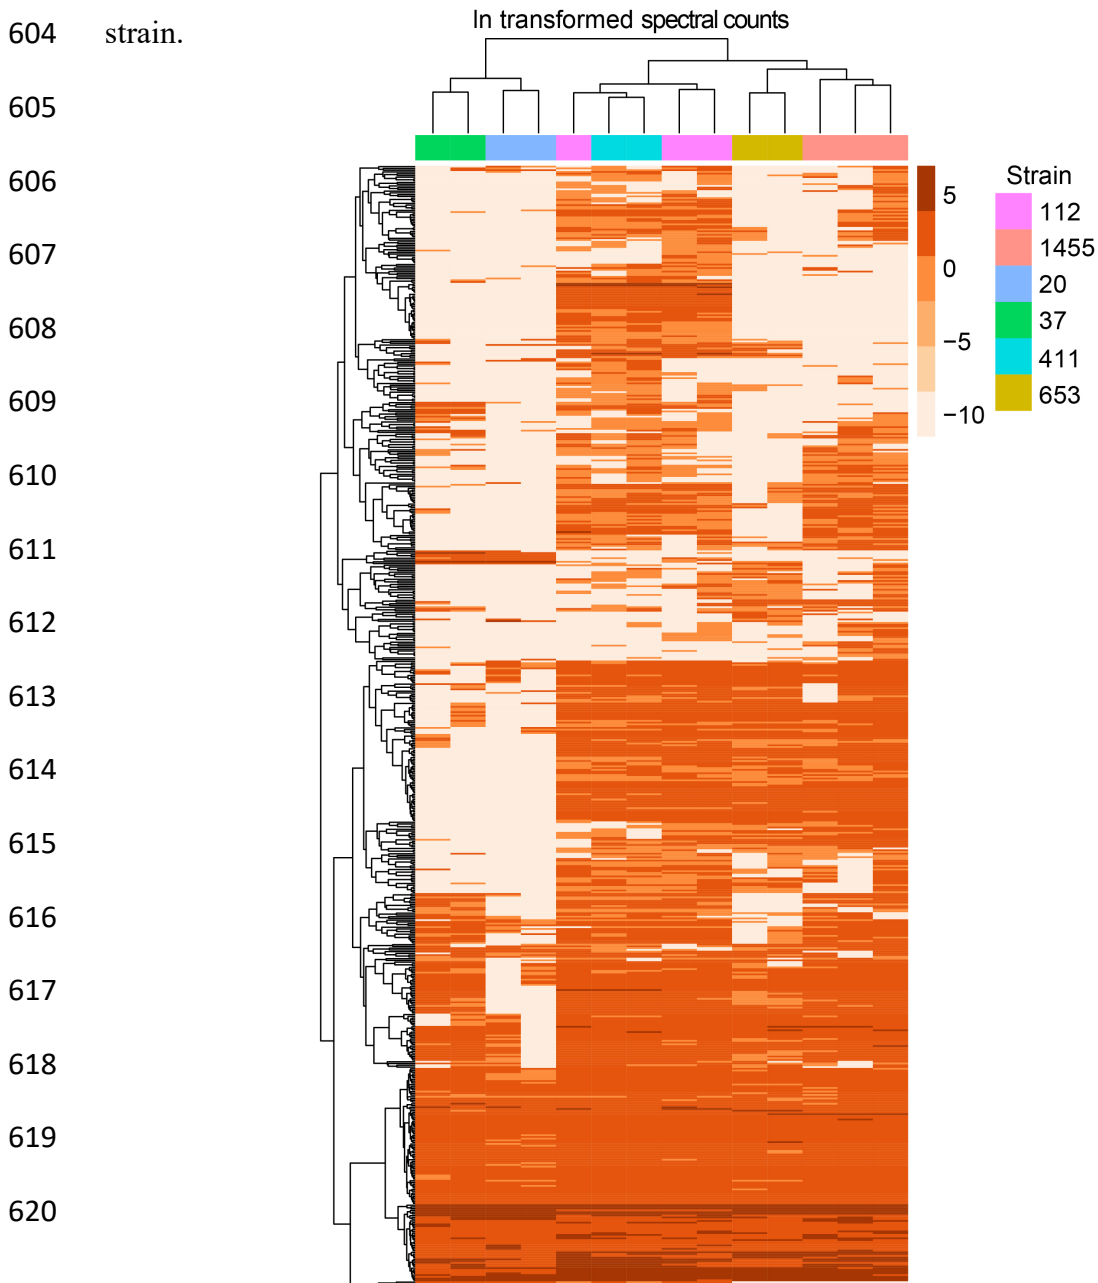

621 **Figure 7: Highly abundant proteins are present at variable levels in membrane vesicles**  
622 **(MVs).** The spectral counts of specific proteins were plotted after stratifying by the sequence  
623 type (ST). The median spectral count associated with each ST is represented within each box.  
624 The black dots represent a single biological replicate for a given strain. Statistical comparison  
625 was performed using a Kruskal Wallis test. Multiple pairwise comparisons were then made using  
626 the `pairw.kw` function in R, which uses a conservative Bonferroni correction method to correct  
627 for multiple hypothesis testing. Comparisons with  $p$ -values  $< 0.05$  are denoted with an asterisk.  
628

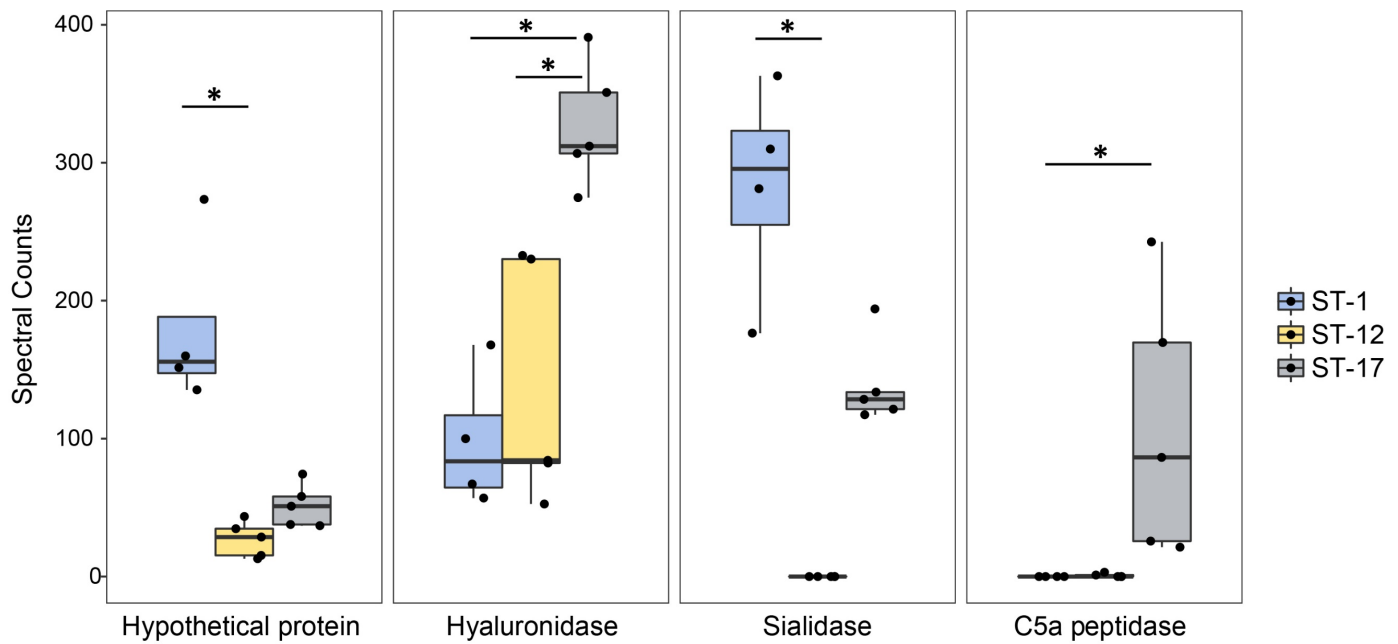

629  
630  
631  
632  
633  
634
